# Supplementary material for: Peri-Operative Risk Factors Associated with Post-Operative Cognitive Dysfunction (POCD): An Umbrella Review of Meta-Analyses of Observational Studies
Source: MDPI journal article supplement (doi:10.3390/jcm12041610), 2023-02-17
Supplement: s1 [file s1]

**Supplementary Table S1. Credibility assessment details**

| <b>Outcome</b>                                                | <b>P &lt; 10<sup>-6</sup></b> | <b>p&lt;10<sup>-3</sup></b> | <b>p&lt;0.05</b> | <b>&gt;1000 cases (or &gt;20,000)</b> | <b>Largest component study reported P &lt; 0.05</b> | <b>95% prediction interval excluded the null</b> | <b>I<sup>2</sup> &lt; 50%</b> | <b>Evidence of small-study effects</b> | <b>Evidence of excess significance bias</b> | <b>Class</b> |
|---------------------------------------------------------------|-------------------------------|-----------------------------|------------------|---------------------------------------|-----------------------------------------------------|--------------------------------------------------|-------------------------------|----------------------------------------|---------------------------------------------|--------------|
| <b>Pre-operative factors</b>                                  |                               |                             |                  |                                       |                                                     |                                                  |                               |                                        |                                             |              |
| Atrial fibrillation (Transcatheter Aortic Valve Implantation) | No                            | No                          | No               | No                                    | No                                                  | No                                               | Yes                           | No                                     | No                                          | <b>V</b>     |
| Age (Transcatheter aortic valve implantation)                 | No                            | No                          | No               | No                                    | No                                                  | No                                               | Yes                           | No                                     | No                                          | <b>V</b>     |
| Age (Coronary artery bypass)                                  | No                            | Yes                         | Yes              | Yes                                   | No                                                  | No                                               | No                            | No                                     | No                                          | <b>III</b>   |
| Age (carotid endarterectomy)                                  | No                            | Yes                         | Yes              | No                                    | No                                                  | No                                               | Yes                           | No                                     | No                                          | <b>IV</b>    |
| APOE4 (cardiac)                                               | No                            | No                          | No               | No                                    | Yes                                                 | No                                               | Yes                           | No                                     | No                                          | <b>V</b>     |
| APOE4 (non-cardiac)                                           | No                            | No                          | No               | No                                    | Yes                                                 | No                                               | No                            | No                                     | No                                          | <b>V</b>     |
| Arrhythmia (coronary artery bypass)                           | No                            | No                          | No               | No                                    | No                                                  | No                                               | Yes                           | No                                     | No                                          | <b>V</b>     |
| BMI (coronary artery bypass)                                  | No                            | No                          | No               | No                                    | No                                                  | No                                               | Yes                           | No                                     | No                                          | <b>V</b>     |

|                                                                |    |     |     |    |     |    |     |    |    |           |
|----------------------------------------------------------------|----|-----|-----|----|-----|----|-----|----|----|-----------|
| BMI (Transcatheter aortic valve implantation)                  | No | No  | No  | No | No  | No | Yes | NE | No | <b>V</b>  |
| Cognition: All tests (coronary artery bypass)                  | No | No  | Yes | No | No  | No | Yes | No | No | <b>IV</b> |
| Cognition: MMSE (coronary artery bypass)                       | No | No  | Yes | No | No  | No | Yes | NE | No | <b>IV</b> |
| Cognitive impairment (coronary artery bypass)                  | No | No  | No  | No | No  | No | Yes | No | No | <b>V</b>  |
| Cognitive impairment (Transcatheter Aortic Valve Implantation) | No | No  | No  | No | No  | No | Yes | NE | No | <b>V</b>  |
| Contralateral stenosis (carotid endarterectomy)                | No | No  | No  | No | No  | No | Yes | No | No | <b>V</b>  |
| C-reactive protein                                             | No | No  | No  | No | No  | No | No  | No | No | <b>V</b>  |
| C-reactive protein (hip arthroplasty)                          | No | Yes | Yes | No | No  | No | No  | No | No | <b>IV</b> |
| Depression (coronary artery bypass)                            | No | No  | Yes | No | Yes | No | No  | No | No | <b>IV</b> |
| Depression: All tests (coronary artery bypass)                 | No | No  | No  | No | No  | No | No  | No | No | <b>V</b>  |
| Diabetes                                                       | No | No  | Yes | No | Yes | No | No  | No | NE | <b>IV</b> |

|                                                                 |     |     |     |     |     |     |     |    |    |            |
|-----------------------------------------------------------------|-----|-----|-----|-----|-----|-----|-----|----|----|------------|
| Diabetes<br>(Transcatheter<br>Aortic Valve<br>Implantation)     | No  | No  | No  | No  | No  | No  | Yes | NE | No | <b>V</b>   |
| Diabetes (carotid<br>endarterectomy)                            | No  | No  | No  | No  | Yes | No  | Yes | No | No | <b>V</b>   |
| Diabetes (coronary<br>artery bypass)                            | No  | Yes | Yes | Yes | Yes | No  | Yes | No | No | <b>III</b> |
| Dyslipidemia<br>(carotid<br>endarterectomy)                     | No  | No  | No  | No  | No  | No  | Yes | No | No | <b>V</b>   |
| Dyslipidemia<br>(coronary artery<br>bypass)                     | No  | No  | No  | No  | No  | No  | Yes | No | No | <b>V</b>   |
| Education                                                       | No  | Yes | Yes | No  | Yes | No  | Yes | No | No | <b>IV</b>  |
| Education<br>(coronary artery<br>bypass)                        | No  | Yes | Yes | No  | Yes | No  | Yes | No | No | <b>IV</b>  |
| Euroscore<br>(coronary artery<br>bypass)                        | Yes | Yes | Yes | No  | Yes | Yes | Yes | No | No | <b>IV</b>  |
| Hypercholesterolemia                                            | No  | No  | No  | No  | No  | No  | Yes | No | No | <b>V</b>   |
| Hypertension                                                    | No  | No  | No  | Yes | No  | No  | Yes | No | NE | <b>V</b>   |
| Hypertension<br>(carotid<br>endarterectomy)                     | No  | No  | No  | Yes | No  | No  | Yes | No | No | <b>V</b>   |
| Hypertension<br>(Transcatheter<br>Aortic Valve<br>Implantation) | No  | No  | No  | No  | No  | No  | Yes | NE | No | <b>V</b>   |

|                                                      |     |     |     |     |     |     |     |     |     |           |
|------------------------------------------------------|-----|-----|-----|-----|-----|-----|-----|-----|-----|-----------|
| Hypertension (coronary artery bypass)                | Yes | Yes | Yes | No  | Yes | Yes | Yes | No  | No  | <b>IV</b> |
| Interleukin 1 $\beta$ (hip arthroplasty)             | No  | No  | Yes | No  | No  | No  | Yes | No  | No  | <b>IV</b> |
| Interleukin 6                                        | No  | Yes | Yes | No  | No  | No  | Yes | No  | No  | <b>IV</b> |
| Interleukin 6 (hip arthroplasty)                     | No  | Yes | Yes | No  | Yes | No  | Yes | No  | No  | <b>IV</b> |
| Kidney injury (coronary artery bypass)               | No  | Yes | <b>V</b>  |
| LVEF% (coronary artery bypass)                       | No  | Yes | Yes | No  | Yes | No  | No  | Yes | No  | <b>IV</b> |
| Male sex (Transcatheter Aortic Valve Implantation)   | No  | No  | No  | No  | No  | No  | Yes | NE  | No  | <b>V</b>  |
| Male sex (carotid endarterectomy)                    | No  | No  | No  | Yes | No  | No  | Yes | No  | No  | <b>V</b>  |
| Male sex (coronary artery bypass)                    | No  | No  | No  | Yes | No  | No  | Yes | No  | No  | <b>V</b>  |
| Obesity                                              | No  | Yes | <b>V</b>  |
| One kg higher body weight (cardiac)                  | No  | No  | No  | No  | No  | No  | Yes | NE  | No  | <b>V</b>  |
| Peripheral vascular disease (coronary artery bypass) | No  | Yes | <b>V</b>  |
| Pre-operative symptoms (carotid endarterectomy)      | No  | No  | No  | No  | Yes | No  | Yes | No  | No  | <b>IV</b> |

|                                                      |    |     |     |    |     |    |     |    |    |           |
|------------------------------------------------------|----|-----|-----|----|-----|----|-----|----|----|-----------|
| Previous MI <90 days (coronary artery bypass)        | No | No  | No  | No | No  | No | Yes | No | No | <b>V</b>  |
| Previous MI history (coronary artery bypass)         | No | No  | No  | No | No  | No | Yes | No | No | <b>V</b>  |
| Previous stroke, TIA, CVA (coronary artery bypass)   | No | Yes | Yes | No | Yes | No | Yes | No | No | <b>IV</b> |
| s100b                                                | No | No  | Yes | No | Yes | No | No  | No | No | <b>IV</b> |
| S100b (hip arthroplasty)                             | No | Yes | Yes | No | No  | No | Yes | No | No | <b>IV</b> |
| Smoking current/history (coronary artery bypass)     | No | No  | No  | No | No  | No | No  | No | No | <b>V</b>  |
| Statin use                                           | No | No  | No  | No | No  | No | Yes | No | No | <b>IV</b> |
| Statin (carotid endarterectomy)                      | No | Yes | Yes | No | No  | No | Yes | No | No | <b>IV</b> |
| Stroke/TIA (Transcatheter Aortic Valve Implantation) | No | No  | No  | No | No  | No | Yes | NE | No | <b>V</b>  |
| Tumour Necrosis Factor alpha (hip arthroplasty)      | No | Yes | Yes | No | No  | No | Yes | No | No | <b>IV</b> |
| <b>Intraoperative factors</b>                        |    |     |     |    |     |    |     |    |    |           |
| Aortic cross clamping time                           | No | Yes | Yes | No | No  | No | Yes | No | No | <b>IV</b> |

|                                                                         |     |     |     |    |     |     |     |     |    |    |
|-------------------------------------------------------------------------|-----|-----|-----|----|-----|-----|-----|-----|----|----|
| (coronary artery bypass)                                                |     |     |     |    |     |     |     |     |    |    |
| CPB time<br>(coronary artery bypass)                                    | Yes | Yes | Yes | No | No  | Yes | Yes | Yes | No | IV |
| Cross-clamping duration (carotid endarterectomy)                        | No  | No  | Yes | No | No  | No  | Yes | Yes | No | IV |
| Cerebral protection device<br>(Transcatheter Aortic Valve Implantation) | No  | No  | No  | No | No  | No  | Yes | NE  | No | V  |
| Hyperperfusion (carotid endarterectomy)                                 | Yes | Yes | Yes | No | Yes | Yes | Yes | No  | No | IV |
| Intubation time (coronary artery bypass)                                | No  | No  | No  | No | No  | No  | No  | No  | No | V  |
| Number of grafts (coronary artery bypass)                               | No  | No  | Yes | No | No  | No  | Yes | Yes | No | IV |
| Selective shunting placement (carotid endarterectomy)                   | No  | No  | No  | No | No  | No  | Yes | No  | No | V  |
| Surgery duration (coronary artery bypass)                               | No  | Yes | Yes | No | No  | No  | Yes | No  | No | IV |
| Total microemboli (coronary artery bypass)                              | No  | No  | Yes | No | No  | No  | Yes | No  | No | IV |
| <b>Post-operative factors</b>                                           |     |     |     |    |     |     |     |     |    |    |

|                                                  |    |     |     |    |     |    |     |    |     |           |
|--------------------------------------------------|----|-----|-----|----|-----|----|-----|----|-----|-----------|
| Arrhythmia (coronary artery bypass)              | No | No  | Yes | No | Yes | No | Yes | No | No  | <b>IV</b> |
| C-reactive protein (hip arthroplasty)            | No | No  | No  | No | No  | No | No  | No | No  | <b>V</b>  |
| Delirium (coronary artery bypass)                | No | Yes | Yes | No | Yes | No | Yes | No | Yes | <b>IV</b> |
| LOS in ICU (coronary artery bypass)              | No | No  | No  | No | No  | No | No  | No | No  | <b>V</b>  |
| Interleukin 6 (hip arthroplasty)                 | No | No  | No  | No | No  | No | Yes | No | No  | <b>V</b>  |
| Interleukin 1 $\beta$ (hip arthroplasty)         | No | No  | No  | No | No  | No | Yes | No | No  | <b>V</b>  |
| Stroke (Transcatheter Aortic Valve Implantation) | No | No  | No  | No | No  | No | Yes | No | No  | <b>V</b>  |
| S100b (hip arthroplasty)                         | No | No  | No  | No | No  | No | Yes | No | No  | <b>V</b>  |
| Tumour Necrosis Factor alpha (hip arthroplasty)  | No | No  | Yes | No | Yes | No | Yes | NE | No  | <b>IV</b> |

Legend: AF = atrial fibrillation, APOE4 = Apolipoprotein E4, BMI = BMI, CPB = cardiopulmonary bypass, CVA= cerebrovascular accident, ICU = intensive care unit, LOS = length of stay, LVEF% = Left ventricular ejection fraction, MI = myocardial infarction, MMSE =Mini Mental State Examination, S100B = S100 calcium-binding protein B, TIA = Transient ischemic attack

**Supplementary Table S2. AMSTAR ratings**

|                                  | AMSTAR Items* |   |   |   |   |   |   |   |   |   |    |    |    |    |    |    |    |       |
|----------------------------------|---------------|---|---|---|---|---|---|---|---|---|----|----|----|----|----|----|----|-------|
| Authors / Reference              | Year          | 1 | 2 | 3 | 4 | 5 | 6 | 7 | 8 | 9 | 10 | 11 | 12 | 13 | 14 | 15 | 16 | TOTAL |
| Aceto et al. <sup>1</sup>        | 2019          | 2 | 1 | 2 | 2 | 2 | 2 | 1 | 2 | 2 | 0  | 2  | 0  | 2  | 1  | 2  | 2  | 25    |
| Cao et al. <sup>2</sup>          | 2014          | 2 | 0 | 2 | 1 | 2 | 2 | 1 | 2 | 0 | 0  | 2  | 0  | 0  | 2  | 2  | 2  | 20    |
| Feinkohl et al. <sup>3</sup>     | 2017          | 2 | 1 | 2 | 1 | 0 | 0 | 1 | 2 | 2 | 0  | 2  | 0  | 0  | 2  | 2  | 2  | 19    |
| Feinkohl et al. <sup>4</sup>     | 2016          | 2 | 0 | 2 | 1 | 0 | 0 | 0 | 2 | 0 | 0  | 2  | 0  | 0  | 2  | 2  | 2  | 15    |
| Feinkohl et al. (2) <sup>5</sup> | 2017          | 2 | 1 | 2 | 1 | 0 | 0 | 1 | 2 | 2 | 0  | 2  | 0  | 0  | 2  | 2  | 2  | 19    |
| Feinkohl et al. <sup>6</sup>     | 2018          | 2 | 1 | 2 | 1 | 0 | 0 | 1 | 2 | 2 | 0  | 2  | 0  | 0  | 2  | 2  | 2  | 19    |
| Feinkohl et al. (3) <sup>7</sup> | 2017          | 2 | 0 | 2 | 1 | 0 | 0 | 1 | 1 | 2 | 0  | 1  | 0  | 0  | 2  | 2  | 2  | 16    |
| Fu et al. <sup>8</sup>           | 2021          | 2 | 0 | 2 | 1 | 2 | 2 | 1 | 1 | 0 | 0  | 2  | 0  | 0  | 2  | 2  | 2  | 19    |
| Ghezzi et al. <sup>9</sup>       | 2019          | 2 | 0 | 2 | 1 | 2 | 2 | 1 | 1 | 0 | 0  | 2  | 0  | 0  | 2  | 0  | 2  | 17    |
| Greaves et al. <sup>10</sup>     | 2020          | 2 | 2 | 2 | 1 | 2 | 2 | 2 | 1 | 0 | 0  | 2  | 1  | 2  | 2  | 2  | 2  | 25    |
| Liu et al. <sup>11</sup>         | 2018          | 2 | 0 | 2 | 2 | 2 | 2 | 1 | 1 | 0 | 0  | 2  | 0  | 0  | 2  | 2  | 2  | 20    |

1. \*Scores for each item are between 0 and 2, where one point is awarded if the study had partial inclusion of methods that reduced bias and two points were awarded for full inclusion of methods to reduce risk of bias.
2. For full description of each individual item, access [https://amstar.ca/Amstar\\_Checklist.php](https://amstar.ca/Amstar_Checklist.php)

## References

1. Aceto P, Lai C, de Crescenzo F, et al. Cognitive decline after carotid endarterectomy: Systematic review and meta-analysis. *European Journal of Anaesthesiology* 2020;37:1066-74.
2. Cao L, Wang K, Gu T, Du B, Song J. Association between APOE epsilon 4 allele and postoperative cognitive dysfunction: A meta-analysis. *International Journal of Neuroscience* 2014;124:478-85.
3. Feinkohl I, Winterer G, Pischon T. Hypertension and risk of post-operative cognitive dysfunction (POCD): A systematic review and meta-analysis. *Clinical Practice and Epidemiology in Mental Health* 2017;13:27-42.
4. Feinkohl I, Winterer G, Pischon T. Obesity and post-operative cognitive dysfunction: a systematic review and meta-analysis. *Diabetes/Metabolism Research and Reviews* 2016;32:643-51.
5. Feinkohl I, Winterer G, Pischon T. Diabetes is associated with risk of postoperative cognitive dysfunction: A meta-analysis. *Diabetes/Metabolism Research and Reviews* 2017;33.
6. Feinkohl I, Winterer G, Pischon T. Associations of dyslipidaemia and lipid-lowering treatment with risk of postoperative cognitive dysfunction: a systematic review and meta-analysis. *Journal of epidemiology and community health* 2018;72:499-506.
7. Feinkohl I, Winterer G, Spies CD, Pischon T. Cognitive Reserve and the Risk of Postoperative Cognitive Dysfunction. *Deutsches Arzteblatt international* 2017;114:110-7.
8. Fu C, Lin J, Gong G, Zhong W, Chen H, Luo X. Inflammatory markers in postoperative cognitive dysfunction for patients undergoing total hip arthroplasty: a meta-analysis. *Aging clinical and experimental research* 2021:1-12.
9. Ghezzi ES, Ross TJ, Davis D, Psaltis PJ, Loetscher T, Keage HAD. Meta-Analysis of Prevalence and Risk Factors for Cognitive Decline and Improvement After Transcatheter Aortic Valve Implantation. *The American journal of cardiology* 2020;127:105-12.
10. Greaves D, Psaltis PJ, Davis DHJ, et al. Risk Factors for Delirium and Cognitive Decline Following Coronary Artery Bypass Grafting Surgery: A Systematic Review and Meta-Analysis. *Journal of the American Heart Association* 2020;9:e017275.
11. Liu X, Yu Y, Zhu S. Inflammatory markers in postoperativedelirium (POD) and cognitive dysfunction (POCD): A meta-analysis of observational studies. *PLoS ONE* 2018;13.
